# Supplementary material for: A highly sensitive fluorescent probe for selective detection of cysteine/homocysteine from glutathione and its application in living cells and tissues
Source: Royal Society of Chemistry journal article supplement (doi:10.1039/c8nj04183k), 2018-01-01
Supplement: c8nj04183k1.pdf [file c8nj04183k1.pdf]

## **A highly sensitive fluorescent probe for selective detection of cysteine/homocysteine from glutathione and its application in living cells and tissues**

Ziyan Zhou <sup>a,#</sup>, Guofeng Duan <sup>b,#</sup>, Yingying Wang <sup>a</sup>, Shikui Yang <sup>a</sup>, Xuyan Liu <sup>a</sup>, Liying Zhang <sup>c</sup>, Runing Sun <sup>b</sup>, Yungen Xu, <sup>d</sup> Yueqing Gu <sup>a</sup>, Xiaoming Zha <sup>a,\*</sup>

<sup>a</sup> *Department of Pharmaceutical Engineering, Department of Biomedical Engineering, School of Engineering, China Pharmaceutical University, 639 Longmian Avenue, Nanjing 211198, China.*

<sup>b</sup> *Department of Traditional Chinese Medicine, Senior Vocational School, China Pharmaceutical University, 639 Longmian Avenue, Nanjing 211198, China.*

<sup>c</sup> *Key Laboratory of Traditional Chinese Medicine Research and Development of Hebei Province, Institute of Traditional Chinese Medicine, Chengde Medical University, Chengde 067000, China.*

<sup>d</sup> *Department of Medicinal Chemistry, School of Pharmacy, China Pharmaceutical University, 24 Tongjiaxiang, Nanjing 210009, China.*

\*Authors for correspondence. Email address: xmzha@cpu.edu.cn (X. Z.)

# These authors contributed equally to this work.

## Contents

|                                                                                               |     |
|-----------------------------------------------------------------------------------------------|-----|
| <b>Fig. S1</b> <sup>1</sup> H-NMR of <b>NIPY-OH</b> . .....                                   | S3  |
| <b>Fig. S2</b> HRMS spectrum of reaction products of the probe <b>NIPY-NBD</b> with Cys. .... | S4  |
| <b>Fig. S3</b> HRMS spectrum of reaction products of the probe <b>NIPY-NBD</b> with Hcy. .... | S5  |
| <b>Fig. S4</b> HRMS spectrum of reaction products of the probe <b>NIPY-NBD</b> with GSH. .... | S6  |
| <b>Fig. S5</b> <sup>1</sup> H-NMR of the probe <b>NIPY-NBD</b> . .....                        | S8  |
| <b>Fig. S6</b> <sup>13</sup> C-NMR of the probe <b>NIPY-NBD</b> . .....                       | S9  |
| <b>Fig. S7</b> HRMS spectrum of the probe <b>NIPY-NBD</b> . .....                             | S10 |
| <b>Fig. S8</b> The response time fluorescence map of the probe <b>NIPY-NBD</b> . .....        | S11 |
| <b>Table. S1</b> Comparison of fluorescent probes for Cys/Hcy from GSH with NBD group. ....   | S12 |

**References.....S17**

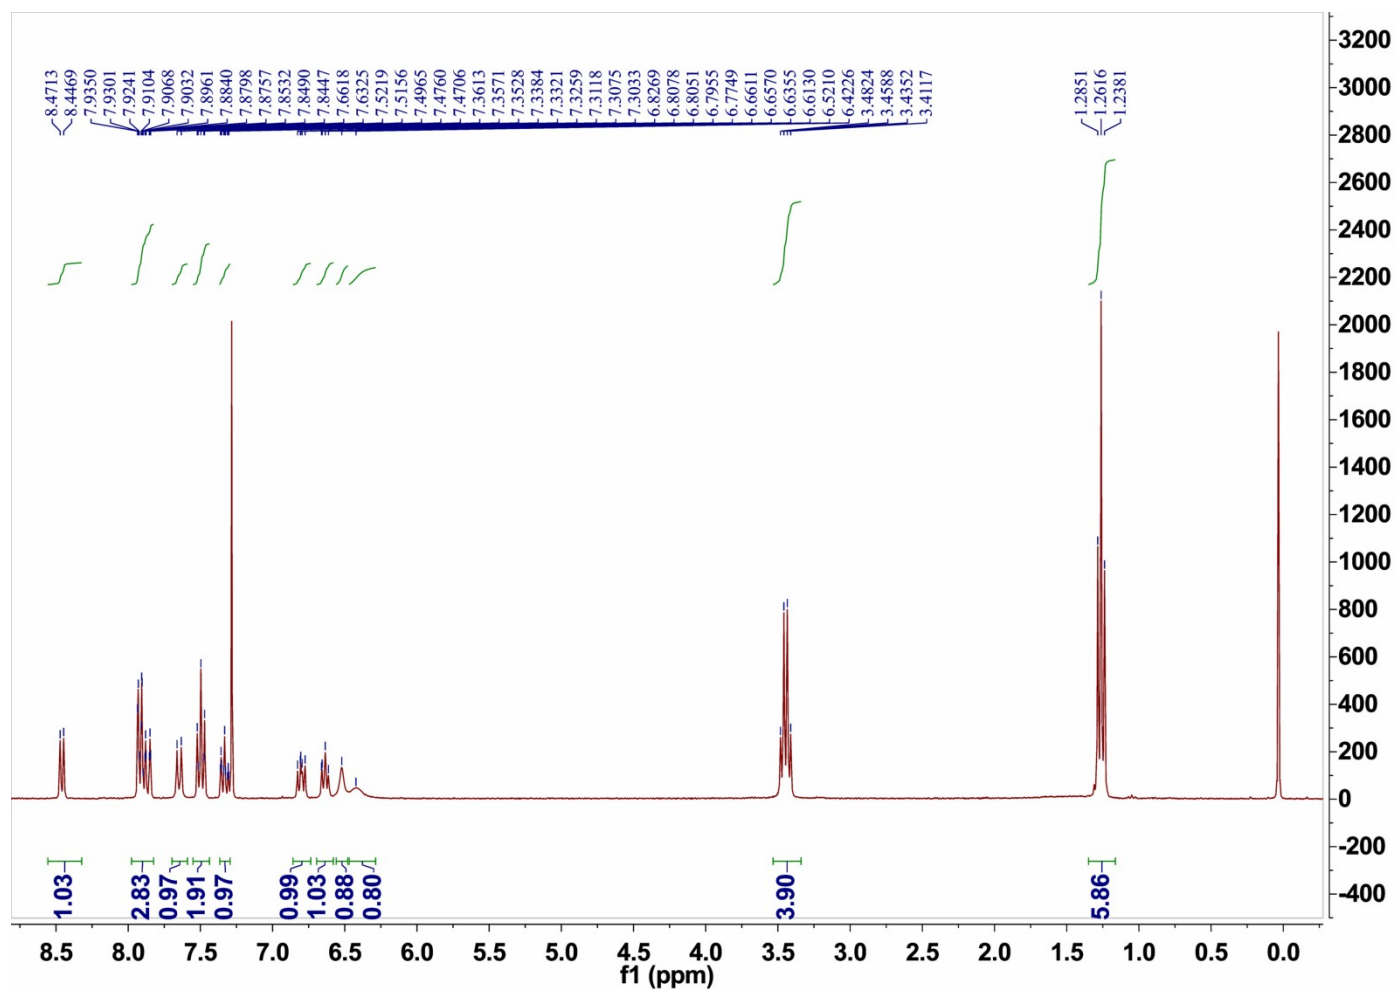

Fig. S1 <sup>1</sup>H-NMR of NIPY-OH

|                    |                     |                               |         |                        |                       |
|--------------------|---------------------|-------------------------------|---------|------------------------|-----------------------|
| <b>Sample Name</b> |                     | <b>Position</b>               | p2f2    | <b>Instrument Name</b> | Instrument 1          |
| <b>User Name</b>   | QTOF-PC/QTOF        | <b>Inj Vol</b>                | 0.1     | <b>InjPosition</b>     |                       |
| <b>Sample Type</b> | Sample              | <b>IRM Calibration Status</b> | Success | <b>Data Filename</b>   | IP-CY-p.d             |
| <b>ACQ Method</b>  | 20110418-MSonly-p.m | <b>Comment</b>                |         | <b>Acquired Time</b>   | 5/17/2018 12:39:55 PM |

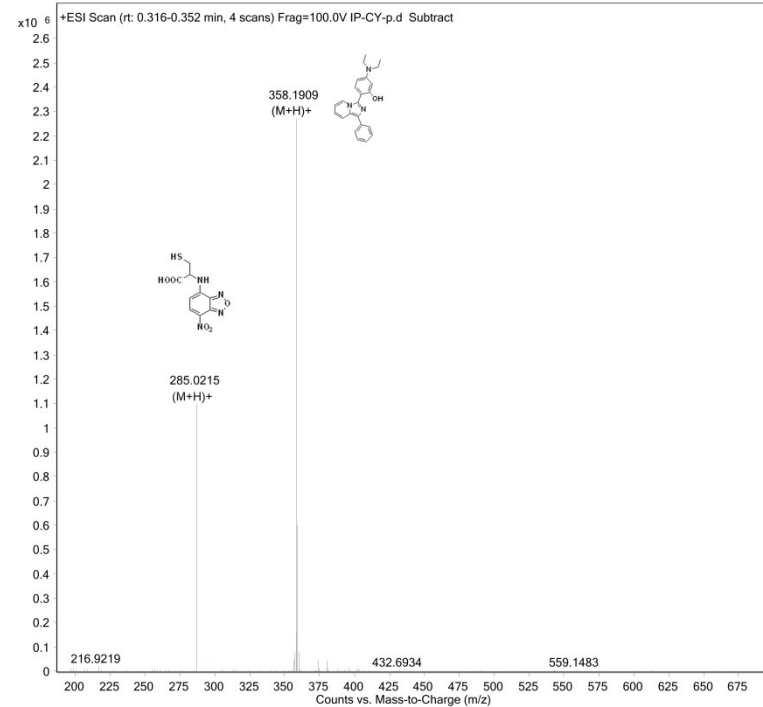

**Fig. S2** HRMS spectrum of reaction products of the probe **NIPY-NBD** with Cys.

|                      |        |                    |                     |                        |              |                               |                       |
|----------------------|--------|--------------------|---------------------|------------------------|--------------|-------------------------------|-----------------------|
| <b>Sample Name</b>   |        | <b>Position</b>    | P1f3                | <b>Instrument Name</b> | Instrument 1 | <b>User Name</b>              | QTOF-PC\QTOF          |
| <b>Inj Vol</b>       | 1      | <b>InjPosition</b> |                     | <b>SampleType</b>      | Sample       | <b>IRM Calibration Status</b> | Success               |
| <b>Data Filename</b> | CY-p.d | <b>ACQ Method</b>  | 20110418-MSonly-p.m | <b>Comment</b>         |              | <b>Acquired Time</b>          | 5/22/2018 12:09:24 PM |

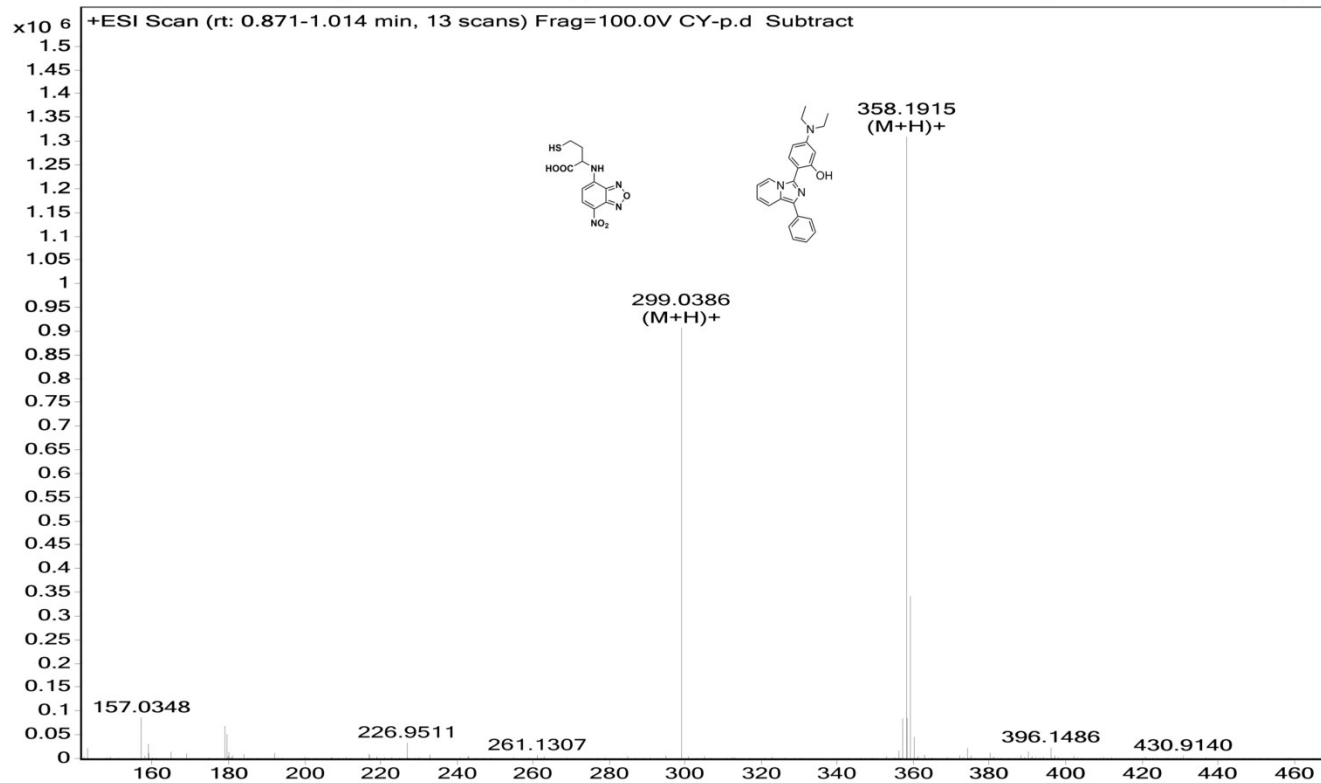

**Fig. S3** HRMS spectrum of reaction products of the probe **NIPY-NBD** with Hey.

|                    |                     |                               |         |                        |                       |
|--------------------|---------------------|-------------------------------|---------|------------------------|-----------------------|
| <b>Sample Name</b> |                     | <b>Position</b>               | p2f3    | <b>Instrument Name</b> | Instrument 1          |
| <b>User Name</b>   | QTOF-PC\QTOF        | <b>Inj Vol</b>                | 0.1     | <b>InjPosition</b>     |                       |
| <b>Sample Type</b> | Sample              | <b>IRM Calibration Status</b> | Success | <b>Data Filename</b>   | IP-GS-p.d             |
| <b>ACQ Method</b>  | 20110418-MSonly-p.m | <b>Comment</b>                |         | <b>Acquired Time</b>   | 5/17/2018 12:42:57 PM |

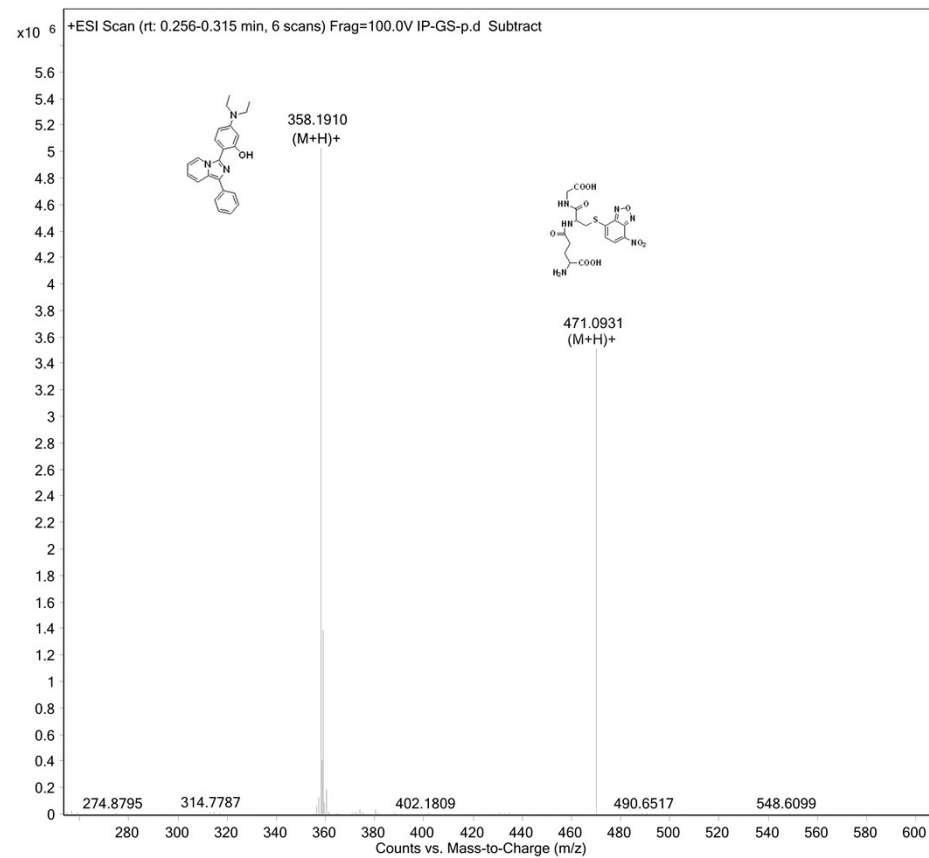

**Fig. S4** HRMS spectrum of reaction products of the probe **NIPY-NBD** with GSH.

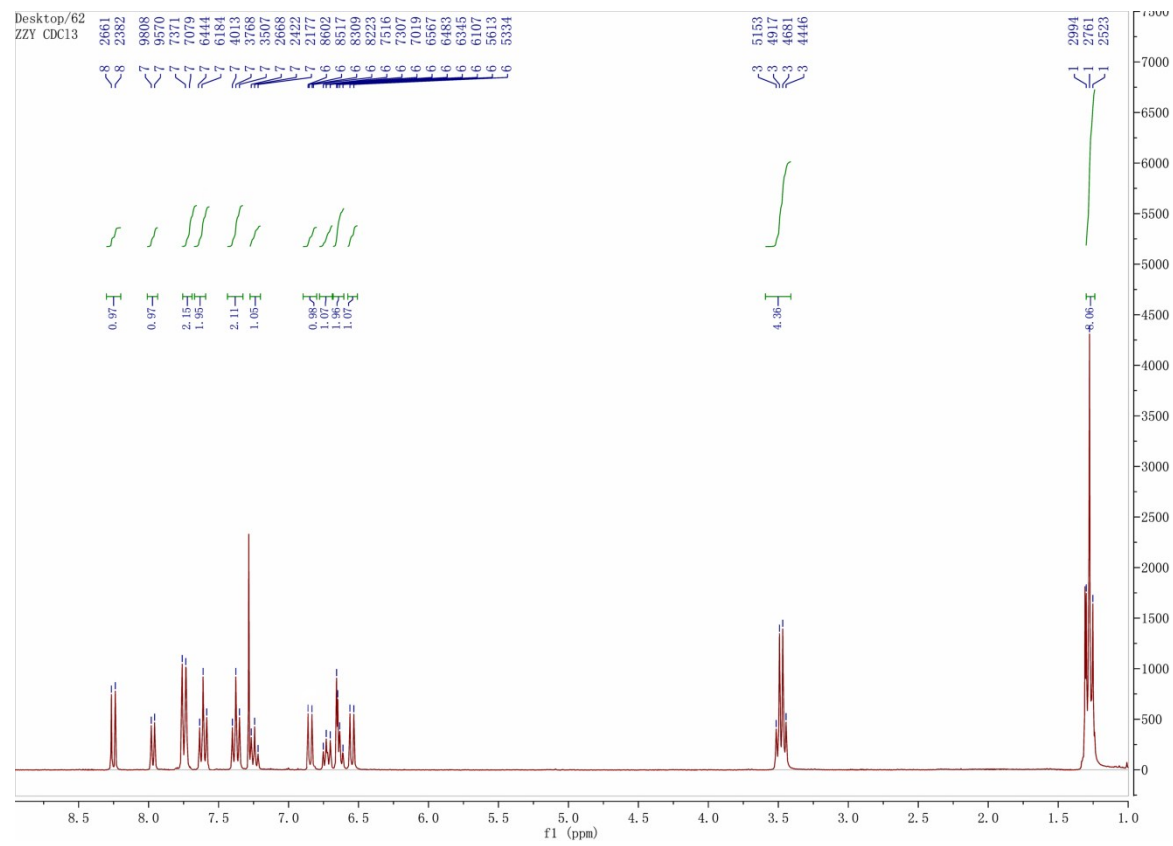



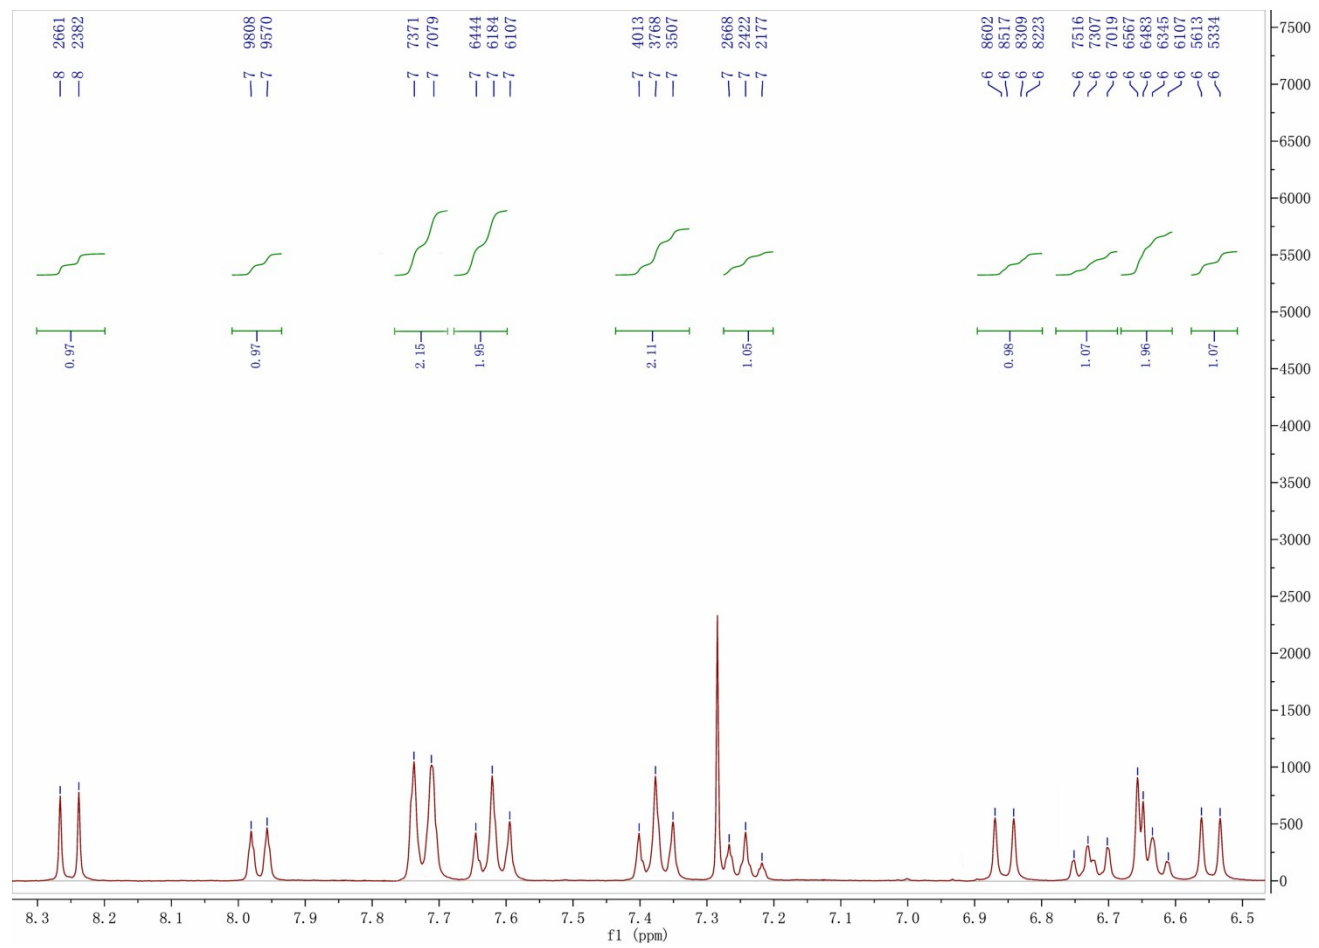

**Fig. S5**  $^1\text{H}$ -NMR of the probe NIPY-NBD.

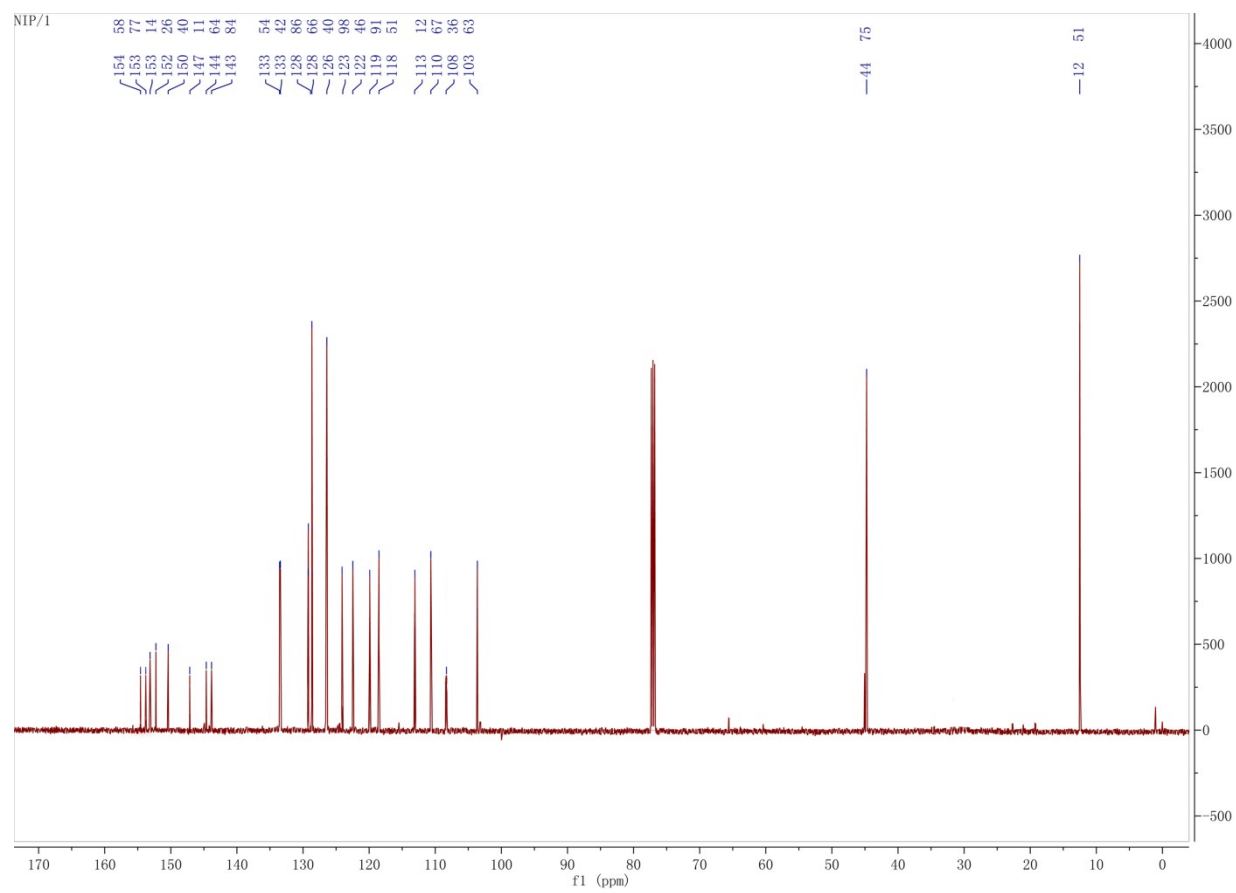

**Fig. S6**  $^{13}\text{C}$ -NMR of the probe **NIPY-NBD**.

|                    |                     |                               |         |                        |                       |
|--------------------|---------------------|-------------------------------|---------|------------------------|-----------------------|
| <b>Sample Name</b> |                     | <b>Position</b>               | p2f1    | <b>Instrument Name</b> | Instrument 1          |
| <b>User Name</b>   | QTOF-PCIQTOF        | <b>Inj Vol</b>                | 0.1     | <b>InjPosition</b>     |                       |
| <b>Sample Type</b> | Sample              | <b>IRM Calibration Status</b> | Success | <b>Data Filename</b>   | IP-N-p.d              |
| <b>ACQ Method</b>  | 20110418-MSonly-p.m | <b>Comment</b>                |         | <b>Acquired Time</b>   | 5/17/2018 12:35:56 PM |

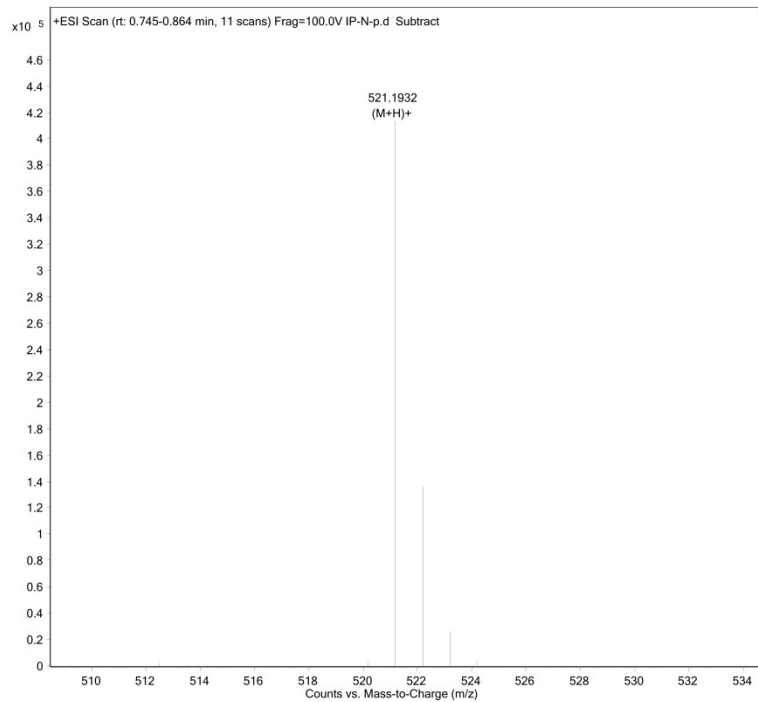

**Fig. S7** HRMS spectrum of the probe **NIPY-NBD**.

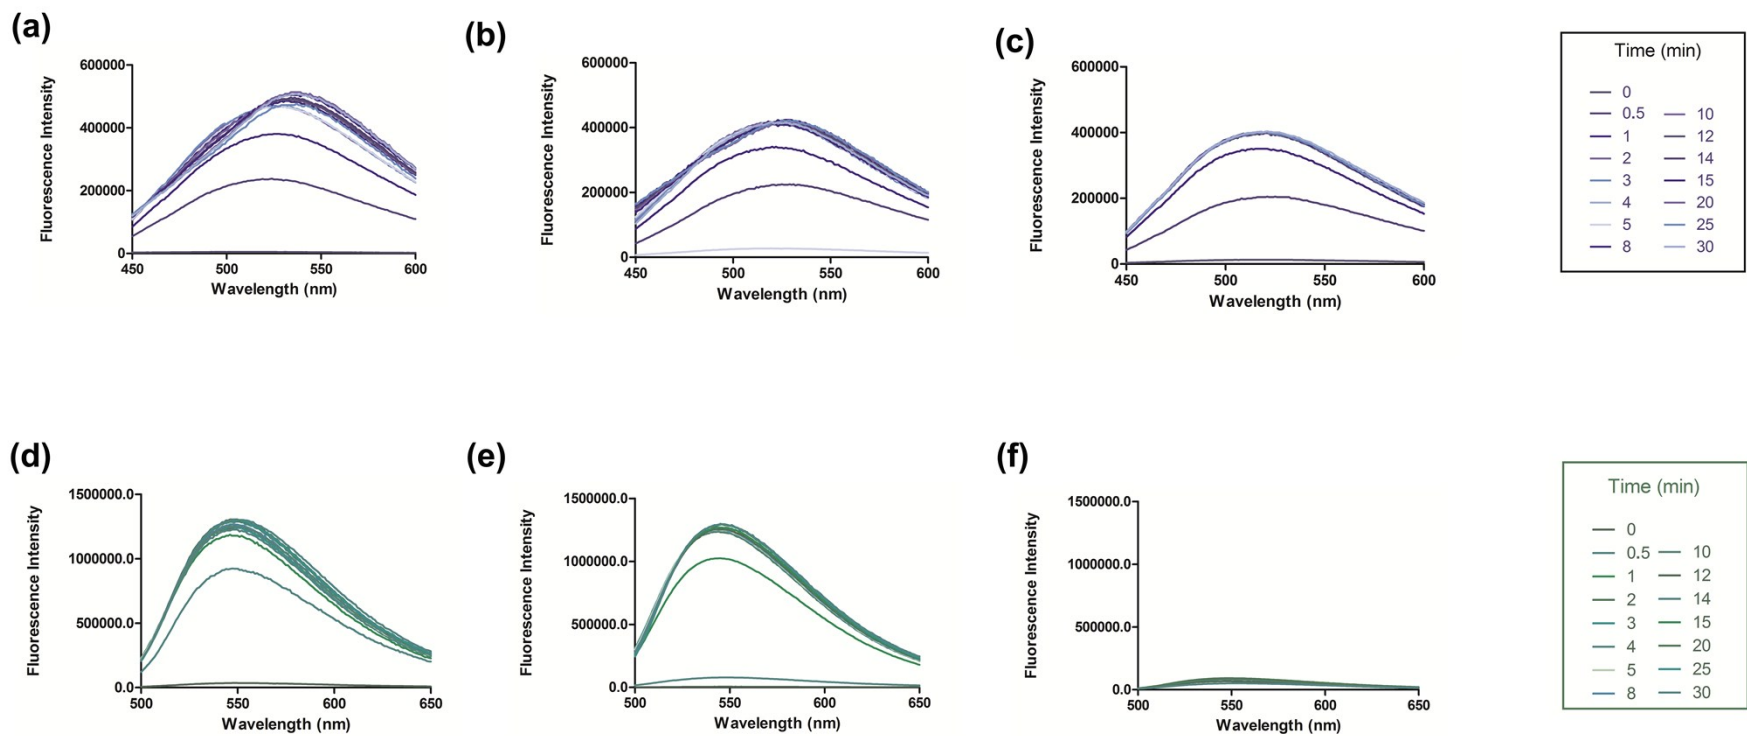

**Fig. S8** The response time fluorescence map of the probe **NIPY-NBD** (10  $\mu\text{M}$ ) with time after adding 20  $\mu\text{M}$  Cys/Hcy and GSH in PBS-DMSO buffer (v/v = 1/1). (a,d: adding Cys, b,e: adding Hcy, c,f: adding GSH, a-c:  $\lambda_{\text{ex/em}} = 310 / 520 \text{ nm}$ , d-f:  $\lambda_{\text{ex/em}} = 470 / 550 \text{ nm}$ ).

**Table. S1** Comparison of fluorescent probes for Cys/Hcy from GSH with NBD group.

| Probes                                                                                                                              | Fluorescence enhancement (at the concentration of Cys) | Response time/Limit of detection                                        | Spectral separation Probe between two emissions/Stokes Shift                                                                                  | Reference |
|-------------------------------------------------------------------------------------------------------------------------------------|--------------------------------------------------------|-------------------------------------------------------------------------|-----------------------------------------------------------------------------------------------------------------------------------------------|-----------|
| 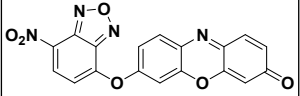 <p><i>Chem. Commun</i>, <b>2015</b></p>           | 81 fold (I403/I519) at 320 $\mu$ M                     | 10 min;<br>For Cys and GSH - 130 and 70 nM, respectively                | $\lambda_{\text{ex1}}=470$ nm ; $\lambda_{\text{em1}}=540$ nm<br>$\lambda_{\text{ex2}}=470$ nm ; $\lambda_{\text{em2}}=585$ nm<br>70 & 115 nm | 1         |
|  <p><i>Biosens. Bioelectron</i> , <b>2016</b></p> | 100 fold at 100 $\mu$ M                                | 5 min /20 min;<br>For Cys, Hcy and GSH - 27, 25 and 16 nM, respectively | $\lambda_{\text{ex1}}=470$ nm ; $\lambda_{\text{em1}}=550$ nm<br>$\lambda_{\text{ex2}}=670$ nm ; $\lambda_{\text{em2}}=716$ nm<br>80 & 46 nm  | 2         |

|                                                                                                                         |                       |                                                                                  |                                                                                                                                                                                 |   |
|-------------------------------------------------------------------------------------------------------------------------|-----------------------|----------------------------------------------------------------------------------|---------------------------------------------------------------------------------------------------------------------------------------------------------------------------------|---|
| 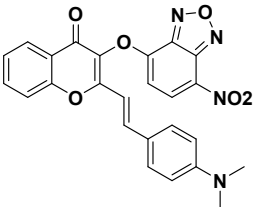 <p><i>Anal. Chem.</i> <b>2016</b></p> | 70 fold at 30 $\mu$ M | <p>120 min</p> <p>For Cys, Hcy and GSH- 2100, 2700 and 6400 nM, respectively</p> | <p><math>\lambda_{ex1}=650</math> nm; <math>\lambda_{em1}=705</math> nm;</p> <p><math>\lambda_{ex2}=476</math> nm; <math>\lambda_{em2}=545</math> nm;</p> <p>55 &amp; 79 nm</p> | 3 |
|-------------------------------------------------------------------------------------------------------------------------|-----------------------|----------------------------------------------------------------------------------|---------------------------------------------------------------------------------------------------------------------------------------------------------------------------------|---|

|                                                                                                                                     |                         |                                                                   |                                                                                                                                             |   |
|-------------------------------------------------------------------------------------------------------------------------------------|-------------------------|-------------------------------------------------------------------|---------------------------------------------------------------------------------------------------------------------------------------------|---|
| 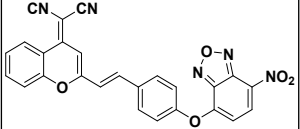 <p><i>Sens. Actuators B-Chem</i>, <b>2017</b></p> | 54 fold at 20 $\mu$ M   | 15 min;<br>For Cys, Hcy and GSH - 21, 17 and 26 nM, respectively  | $\lambda_{\text{ex1}}=475$ nm; $\lambda_{\text{em1}}=560$ nm<br>$\lambda_{\text{ex2}}=560$ nm; $\lambda_{\text{em2}}=700$ nm<br>85 & 140 nm | 4 |
|  <p><i>Chem. Commun.</i> <b>2017</b></p>           | 30 fold at 10 mM        | 10 min;<br>For Cys, Hcy and GSH - 80, 170 and 50 nM, respectively | $\lambda_{\text{ex1}}=470$ nm; $\lambda_{\text{em1}}=540$ nm;<br>$\lambda_{\text{ex2}}=670$ nm; $\lambda_{\text{em2}}=730$ nm<br>70 & 60 nm | 5 |
|  <p><i>Tetrahedron</i>, <b>2017</b></p>           | 118 fold at 100 $\mu$ M | 12 min;<br>For Cys, Hcy – 35 and 26 nM                            | $\lambda_{\text{ex}}=470$ nm; $\lambda_{\text{em}}=550$ nm;<br>80 nm                                                                        | 6 |

|                                                                                                                               |          |                                    |                                                                                                                                                                                                            |          |
|-------------------------------------------------------------------------------------------------------------------------------|----------|------------------------------------|------------------------------------------------------------------------------------------------------------------------------------------------------------------------------------------------------------|----------|
| 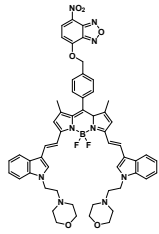 <p><i>J.Mater. Chem. B</i>, <b>2017</b></p> | <p>*</p> | <p>30 min;<br/>For Cys - 22 nM</p> | <p><math>\lambda_{\text{ex1}}=466 \text{ nm}; \lambda_{\text{em1}}=540 \text{ nm};</math><br/><math>\lambda_{\text{ex2}}=650 \text{ nm}; \lambda_{\text{em2}}=735 \text{ nm}</math><br/>74 &amp; 85 nm</p> | <p>7</p> |
|-------------------------------------------------------------------------------------------------------------------------------|----------|------------------------------------|------------------------------------------------------------------------------------------------------------------------------------------------------------------------------------------------------------|----------|



|                                                                                                                                              |                        |                                                                |                                                                                                                      |    |
|----------------------------------------------------------------------------------------------------------------------------------------------|------------------------|----------------------------------------------------------------|----------------------------------------------------------------------------------------------------------------------|----|
| 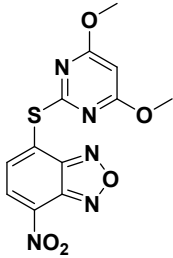 <p><i>Acta. A. Mol. Biomol. Spectrosc</i>, <b>2017</b></p> | 78 fold at 10 $\mu$ M  | 10 min;<br>For Cys and Hcy - 95 and 138 nM, respectively       | $\lambda_{ex}$ =419 nm; $\lambda_{em}$ =547 nm;<br>128 nm                                                            | 8  |
|  <p><i>Anal. Chim. Acta</i>, <b>2017</b></p>                | 9.3 fold at 10 $\mu$ M | 8 min;<br>For Cys, Hcy and GSH- 21, 37 and 28 nM, respectively | $\lambda_{ex1}$ =463 nm; $\lambda_{em1}$ =544 nm;<br>$\lambda_{ex2}$ =650 nm; $\lambda_{em2}$ =707 nm;<br>81 & 57 nm | 9  |
|  <p><i>Dyes Pigments</i>, <b>2017</b></p>                 | 35 fold at 10 $\mu$ M  | 10 min<br>For Cys, Hcy and GSH- 51, 16 and 34 nM, respectively | $\lambda_{ex1}$ =440 nm; $\lambda_{em1}$ =500 nm;<br>$\lambda_{ex2}$ =400 nm; $\lambda_{em2}$ =443 nm;<br>60 & 43 nm | 10 |

|                                                                                                                                     |                                          |                                                                                     |                                                                                                                                                                           |           |
|-------------------------------------------------------------------------------------------------------------------------------------|------------------------------------------|-------------------------------------------------------------------------------------|---------------------------------------------------------------------------------------------------------------------------------------------------------------------------|-----------|
| 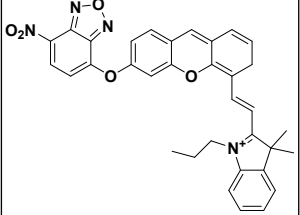 <p><i>Sens. Actuators B-Chem</i>, <b>2017</b></p> | <p>50 fold at 30 <math>\mu</math>M</p>   | <p>5 min<br/>For Cys and GSH- 68 and 81 nM</p>                                      | <p><math>\lambda_{ex1}</math>=480 nm; <math>\lambda_{em1}</math>=540 nm;<br/><math>\lambda_{ex2}</math>=670 nm; <math>\lambda_{em2}</math>=702 nm;<br/>60 &amp; 32 nm</p> | <p>11</p> |
|  <p><i>Dyes Pigments</i>, <b>2018</b></p>          | <p>103 fold at 100 <math>\mu</math>M</p> | <p>10 min;<br/>For Cys, Hcy - 176 and 124 nM</p>                                    | <p><math>\lambda_{ex}</math>=460 nm; <math>\lambda_{em}</math>=565 nm;<br/>105 nm</p>                                                                                     | <p>12</p> |
|                                                  | <p>10 fold at 120 <math>\mu</math>M</p>  | <p>15 min / 28 min;<br/>For Cys, Hcy and GSH –12, 13<br/>and 6 nM, respectively</p> | <p><math>\lambda_{ex1}</math>=502 nm; <math>\lambda_{em1}</math>=610 nm;<br/><math>\lambda_{ex2}</math>=487 nm; <math>\lambda_{em2}</math>=547 nm<br/>108 &amp; 60 nm</p> | <p>13</p> |

|                                             |  |  |  |  |
|---------------------------------------------|--|--|--|--|
| <i>Sens. Actuators B-Chem</i> , <b>2018</b> |  |  |  |  |
|---------------------------------------------|--|--|--|--|

|                                                                                                                                     |                                                                                                                                                                          |                                                                                        |                                                                                                                                                                                  |                         |
|-------------------------------------------------------------------------------------------------------------------------------------|--------------------------------------------------------------------------------------------------------------------------------------------------------------------------|----------------------------------------------------------------------------------------|----------------------------------------------------------------------------------------------------------------------------------------------------------------------------------|-------------------------|
| 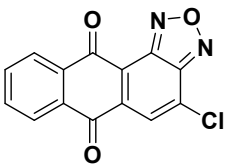 <p><i>Sens. Actuators B Chem</i>, <b>2018</b></p> | <p>17 fold at 150 <math>\mu</math>M with only GSH</p>                                                                                                                    | <p>30 min;<br/>For GSH- 89 nM</p>                                                      | <p><math>\lambda_{ex}</math>=465 nm; <math>\lambda_{em}</math>=558 nm;<br/>93 nm</p>                                                                                             | <p>14</p>               |
|                                                    | <p><b>100 fold</b> (<math>\lambda_{ex}/em</math> = 310 nm /520 nm) &amp;<br/><b>210 fold</b> (<math>\lambda_{ex}/em</math> = 340 nm /550 nm) at 20 <math>\mu</math>M</p> | <p><b>2.5 min;</b><br/><b>For Cys, Hcy and GSH- 21, 46 and 63 nM, respectively</b></p> | <p><math>\lambda_{ex1}</math>=310 nm; <math>\lambda_{em1}</math>=520 nm;<br/><math>\lambda_{ex2}</math>=470 nm; <math>\lambda_{em2}</math>=550 nm<br/><b>210 &amp; 80 nm</b></p> | <p><b>This work</b></p> |

\*The data was not mentioned.

## References

- 1 Y. Zhang, X. Shao, Y. Wang, F. Pan, R. Kang, F. Peng, Z. Huang, W. Zhang and W. Zhao, *Chem. Commun.*, 2015, **51**, 4245–8.
- 2 Q. Hu, C. Yu, X. Xia, F. Zeng and S. Wu, *Biosens. Bioelectron.*, 2016, **81**, 341–348.
- 3 W. Chen, H. Luo, X. Liu, J. W. Foley and X. Song, *Anal. Chem.*, 2016, **88**, 3638–3646.
- 4 P. Wang, Y. Wang, N. Li, J. Huang, Q. Wang and Y. Gu, *Sens. Actuators B Chem.*, 2017, **245**, 297–304.
- 5 H. J. Xiang, H. P. Tham, M. D. Nguyen, S. Z. Fiona Phua, W. Q. Lim, J. G. Liu and Y. Zhao, *Chem. Commun.*, 2017, **53**, 5220–5223.
- 6 C. Zhang, S. Wu, Z. Xi and L. Yi, *Tetrahedron*, 2017, **73**, 6651–6656.
- 7 Z. Ye, C. Duan, Q. Hu, Y. Zhang, C. Qin and L. Zeng, *J. Mater. Chem. B*, 2017, **5**, 3600–3606.
- 8 J. Wang, L. Niu, J. Huang, Z. Yan and J. Wang, *Spectrochim. Acta. A. Mol. Biomol. Spectrosc.*, 2017, **192**, 52.
- 9 X. Yang, L. He, K. Xu and W. Lin, *Anal. Chim. Acta*, 2017, **981**, 86–93.
- 10 X. Qiu, X. Jiao, C. Liu, D. Zheng, K. Huang, Q. Wang, S. He, L. Zhao and X. Zeng, *Dyes Pigments*, 2017, **140**, 212–221.
- 11 J. Xu, J. Pan, Y. Zhang, J. Liu, L. Zeng and X. Liu, *Sens. Actuators B Chem.*, 2017, **238**, 58–65.
- 12 J. Wang, L. Niu, J. Huang, Z. Yan, X. Zhou and J. Wang, *Dyes Pigments*, 2018, **158**, 151–156.
- 13 X. Ren, H. Tian, L. Yang, L. He, Y. Geng, X. Liu and X. Song, *Sens. Actuators B Chem.*, , DOI:10.1016/j.snb.2018.04.163.

14 F. Chen, J. Zhang, W. Qu, X. Zhong, H. Liu, J. Ren, H. He, X. Zhang and S. Wang, *Sens. Actuators B Chem.*, 2018, **266**, 528–533.
